# Supplementary material
Source: PubMed Central journal article supplement (PMC6483605)
Supplement: NIHMS915274-supplement-Supporting_Information.pdf [file NIHMS915274-supplement-Supporting_Information.pdf]

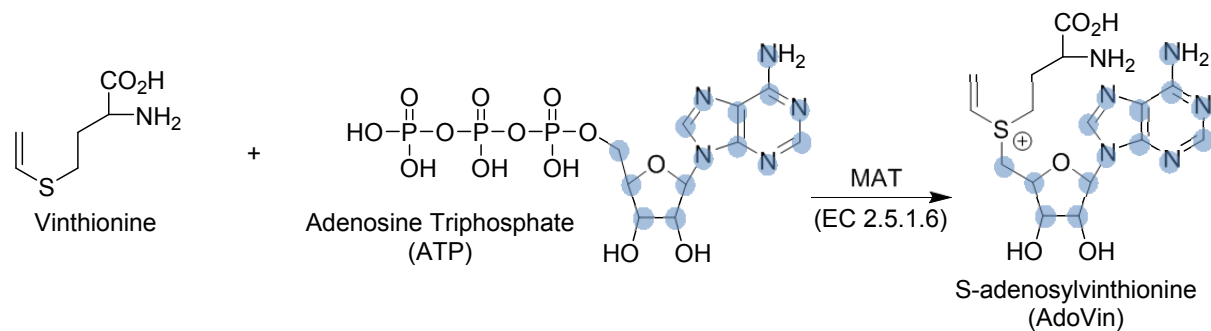

### Figure S1 | S-Adenosylvinthionine Probe Preparation

S-Adenosylvinthionine (AdoVin) is synthesized enzymatically using S-adenosylmethionine synthetase (MAT, EC 2.5.1.6). Vinthionine (1 mM) is combined with adenosine triphosphate (ATP) (2 mM) in the presence of KCl (10 mM) and MgCl<sub>2</sub> (5 mM) in tris buffered saline (pH 7.9). MAT (25 μM) is added to start the reaction, which is then incubated at 37°C for 4 hours. ATP can be labeled with stable isotopes <sup>13</sup>C and <sup>15</sup>N at the highlighted positions to produce AdoVin with a +15 Da mass shift.

For the *in vitro* samples, the isotopically labeled probe was reacted with the TNB substrate and the TPMT enzyme to form the [TPMT•TNB-AdoVin] complex. Whole cell samples were prepared using unlabeled AdoVin probe, which, along with the TNB substrate, was added to cell lysate from a TPMT-expressing *E. coli* strain to form the complex.

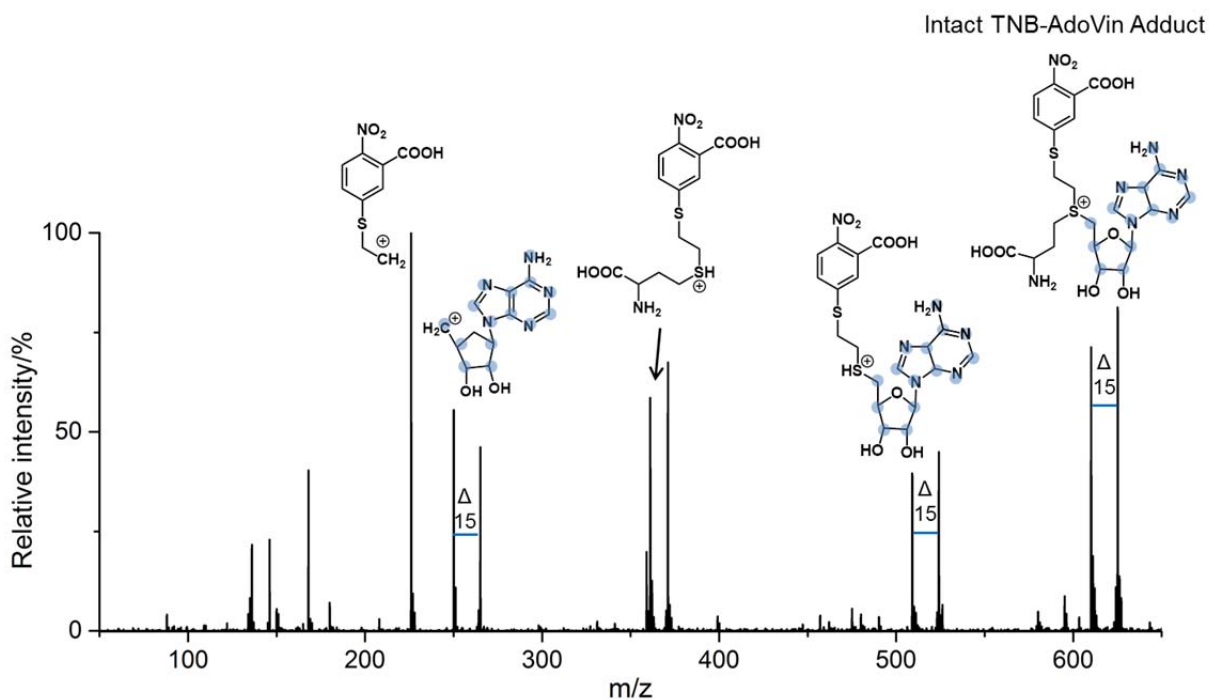

**Figure S2** | Zoom in of Collision Induced Dissociation Mass Spectrum of TNB-AdoVin adduct (mixture of heavy and light reagent) (Fig. 3)

CID tandem mass spectrum of precursor ion  $m/z$  3084 ( $z=10$ ) of the [TPMT•TNB-AdoVin] adduct at a collision energy of 1200 eV, which results in dissociation and fragmentation of the bisubstrate adduct ( $m/z$  50 – 650). The TNB-AdoVin adduct is identified intact with the 15 Da stable isotope labeling present in the adenine group ( $m/z$  610,  $z=1$ ;  $m/z$  625,  $z=1$ ). Additional fragments are identified, some containing the adenine isotope flag (indicated by  $\Delta$ ).

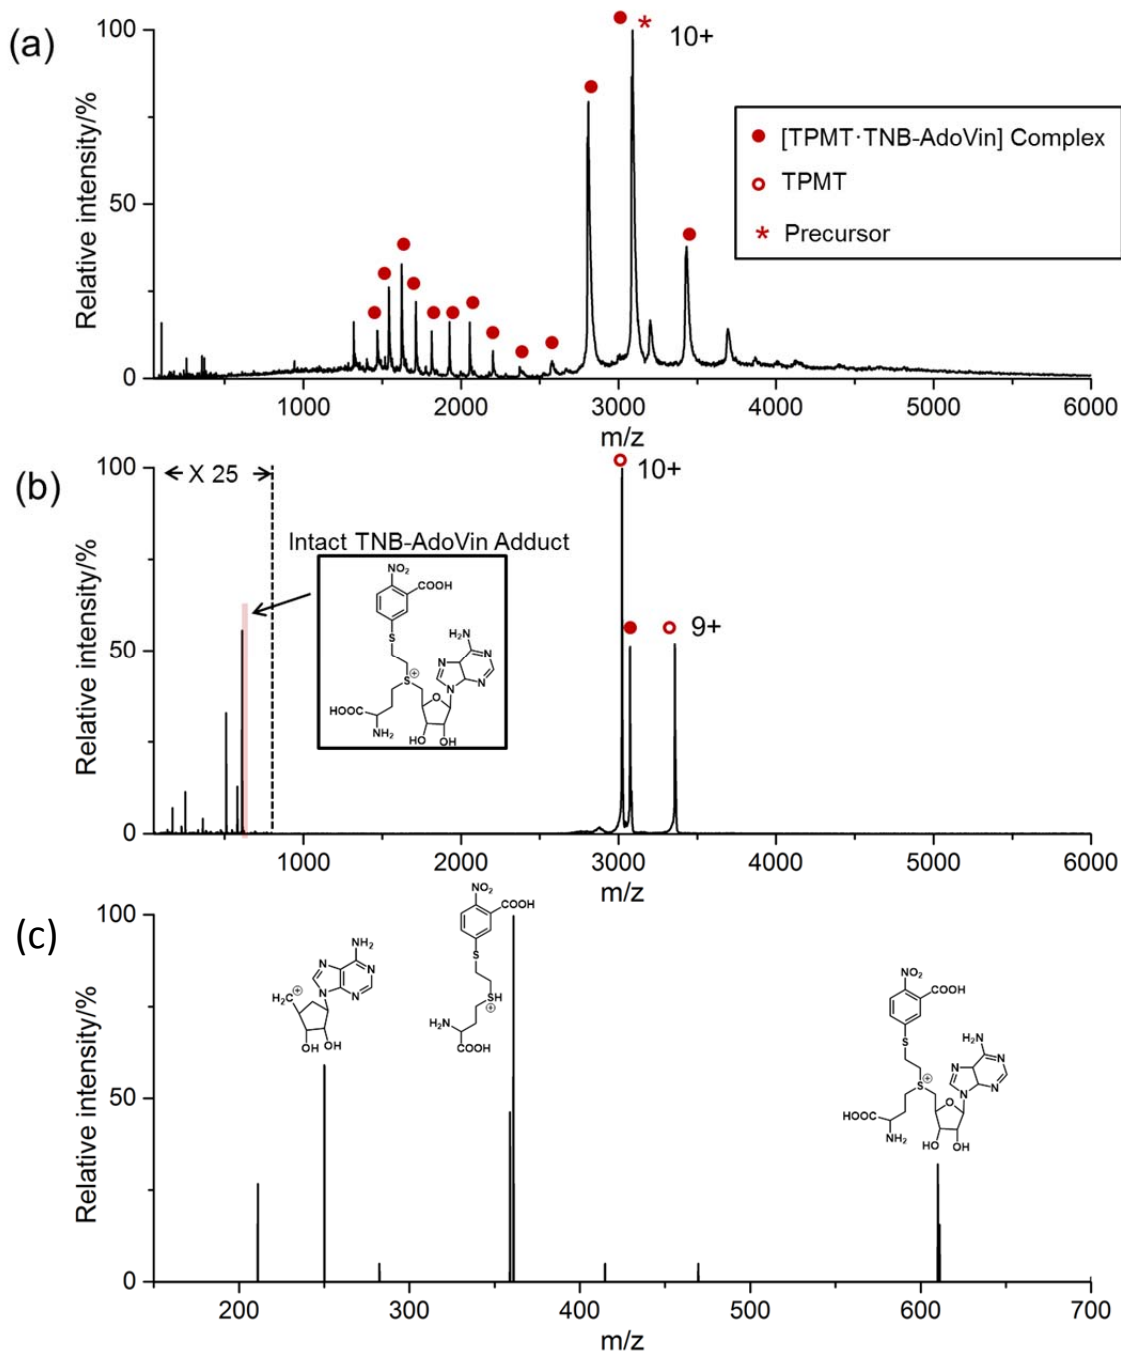

**Figure S3** | Quasi MS<sup>3</sup> of unlabeled TNB-AdoVin adduct

(a) Mass spectrum of *in vitro* [TPMT•TNB-AdoVin] complex (\*) at  $m/z$  3089 ( $z=10$ ).

(b) Tandem mass spectrum after CID at a collision energy of 500 eV of [TPMT•TNB-AdoVin] complex (precursor ion  $m/z$  3089), resulting in apo-TPMT singly charged TNB-AdoVin adduct (highlighted) at  $m/z$  610.

(c) Quasi MS<sup>3</sup> spectrum of CID at a collision energy of 20 eV of TNB-AdoVin adduct (precursor ion  $m/z$  610,  $z=1$ ), resulting in various adduct fragments.

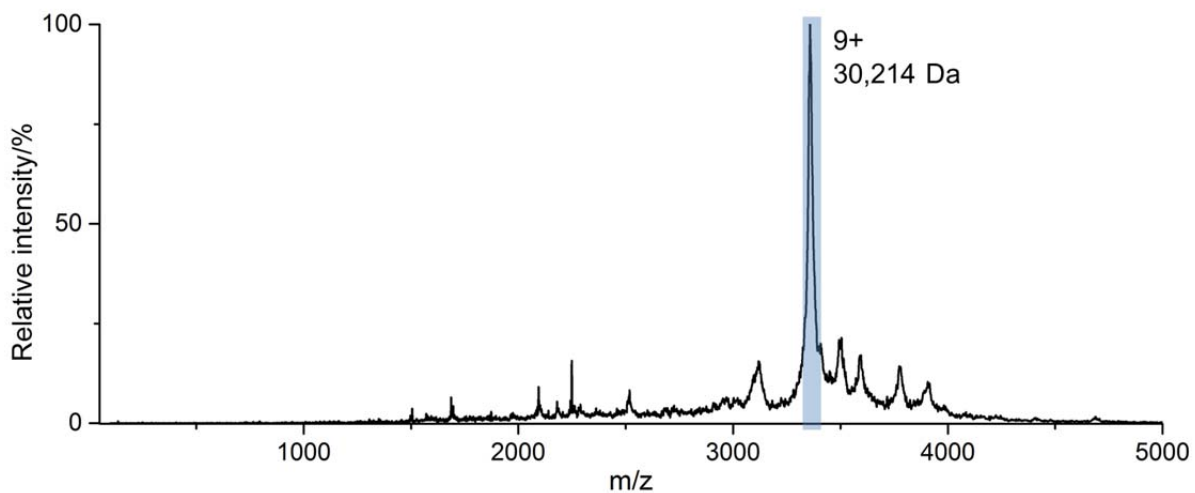

**Figure S4** | Mass Spectrum of Apo-TPMT

CID at a collision energy of 1350 eV of precursor ion  $m/z$  3407 ( $z=9$ , highlighted in blue) dissociates salt adducts and results in TPMT ( $m/z$  3358,  $z=9$ ) with a mass of 30,214 Da. The theoretical mass given the enzyme sequence is 30,343 Da, suggesting N-terminal methionine removal.

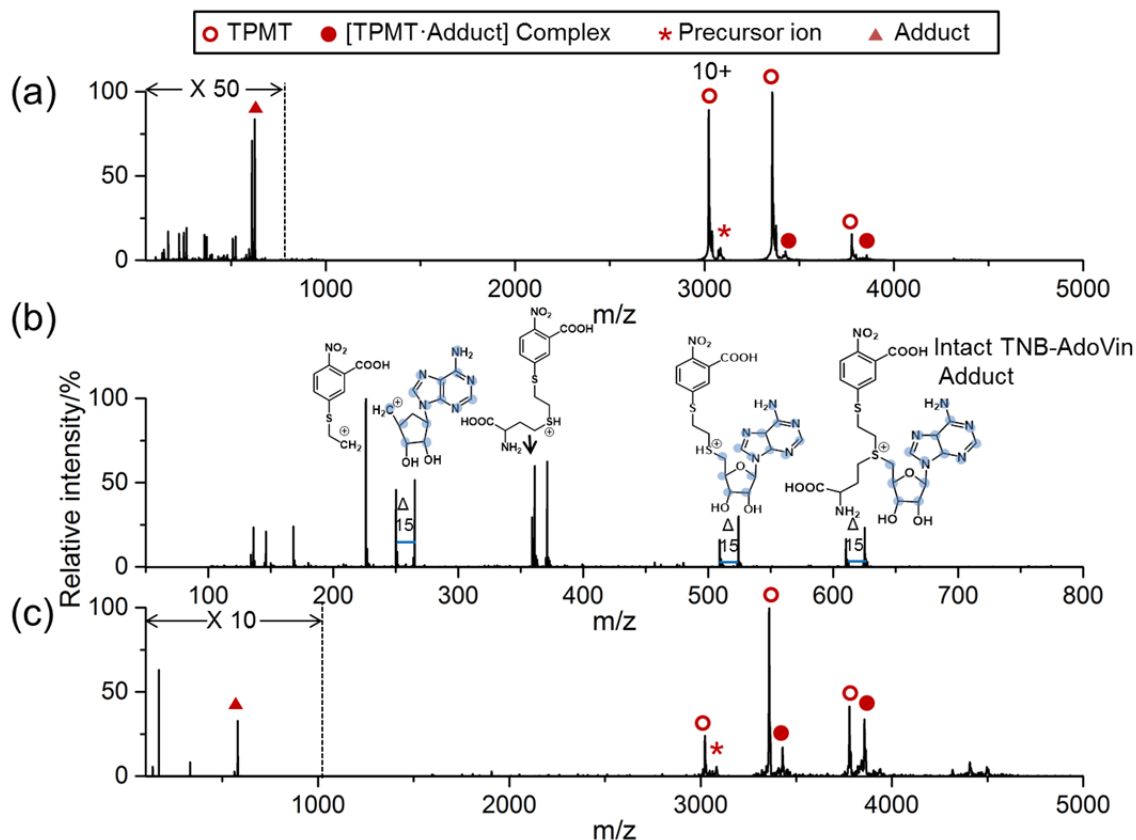

**Figure S5 | Surface Induced Dissociation of [TPMT•Adduct] Complex**

(a) After initial separation of an *in vitro* sample, surface induced dissociation (SID) tandem mass spectrum of precursor ion  $m/z$  3084 ( $z=10$ , from Fig. 3a) of the [TPMT•TNB-AdoVin] adduct (star) at a collision energy of 500 eV. After dissociation, apo- (open circles) and adduct-bound (closed circles) enzyme are observed in multiple charge states. The singly-charged TNB-AdoVin adduct (triangle) is observed with the 15 Da pairing due to stable isotope labeling ( $m/z$  610 and 625).

(b) After initial separation of an *in vitro* sample, SID tandem mass spectrum of precursor ion  $m/z$  3084 ( $z=10$ , from Fig. 3a) of the [TPMT•TNB-AdoVin] adduct at a collision energy of 1000 eV, which results in increased dissociation and fragmentation of the bisubstrate adduct. The TNB-AdoVin adduct is identified intact with the 15 Da stable isotope labeling ( $m/z$  610 and  $m/z$  625). Additional fragments are identified, some containing the adenine isotope flag (indicated by  $\Delta$ ).

(c) After initial separation of an *ex vivo* sample, SID tandem mass spectrum of precursor ion  $m/z$  3080 ( $z=10$ , from Fig. 3c) of the [TPMT•AMBA-AdoVin] adduct (star) at a collision energy of 500 eV. After dissociation, apo- (open circles) and adduct-bound (closed circles) enzyme are observed in multiple charge states. The singly-charged AMBA-AdoVin adduct (triangle) is observed at  $m/z$  580.

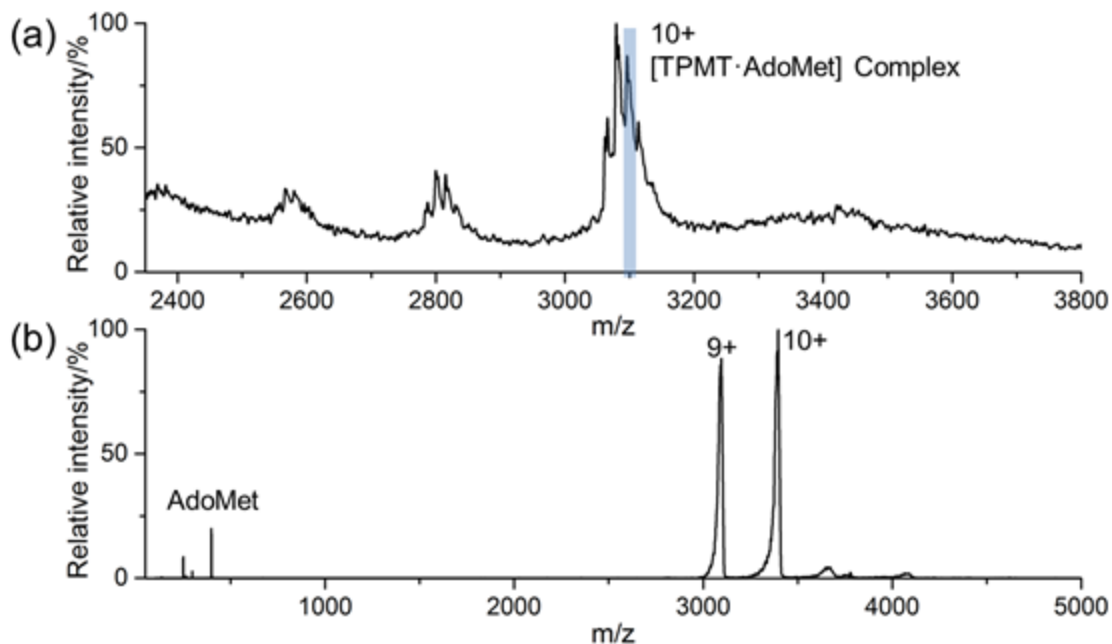

**Figure S6** | Mass Spectrum and Tandem Mass Spectrum of [TPMT•AdoMet] Complex

(a) Mass spectrum of [TPMT•AdoMet] complex (highlighted) at  $m/z$  3096 ( $z=10$ ) formed by combining 4  $\mu\text{M}$  TPMT + 40  $\mu\text{M}$  AdoMet *in vitro*.

(b) Collision induced dissociation (CID) tandem mass spectrum of [TPMT•AdoMet] complex from (a) (precursor ion  $m/z$  3096) at a collision energy of 300 eV. Singly charged AdoMet ( $m/z$  399) and TPMT in multiple charge states ( $z=9$  and 10) were observed.

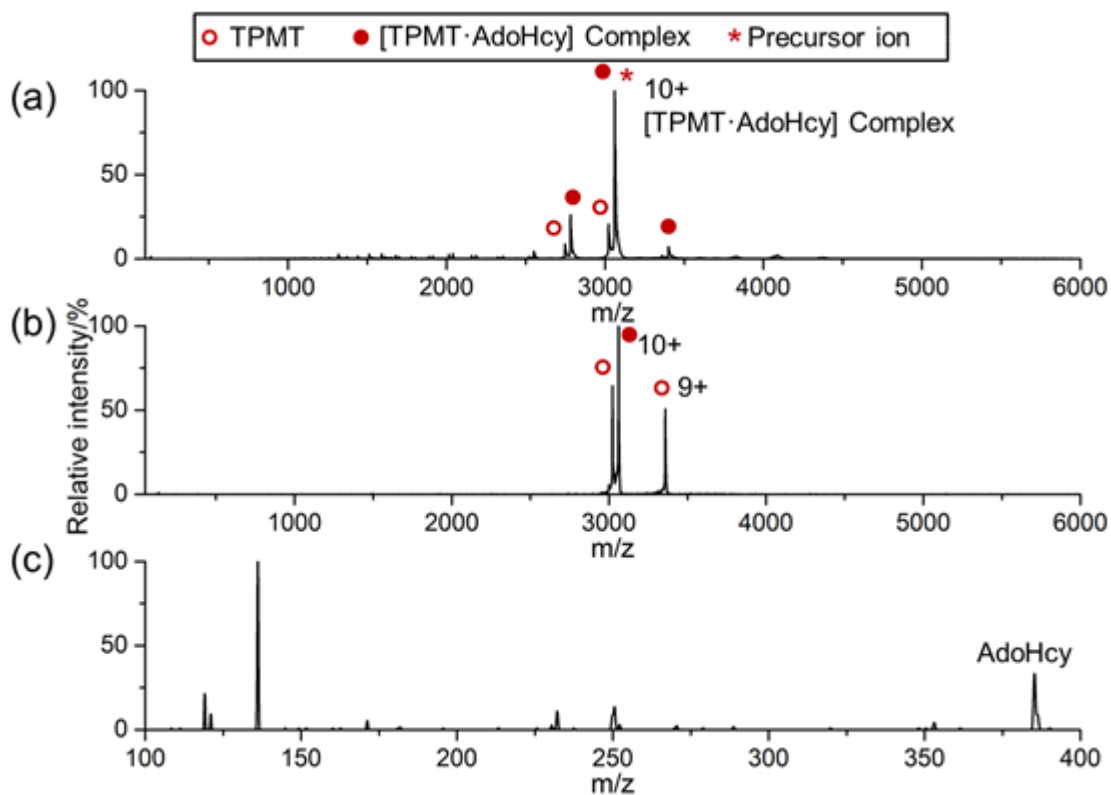

**Figure S7** | Mass Spectrum and Tandem Mass Spectrum of [TPMT·AdoHcy] Complex  
**(a)** Mass spectrum of [TPMT·AdoHcy] complex (highlighted) at  $m/z$  3061 ( $z=10$ ).  
**(b)** Tandem mass spectrum after CID at a collision energy of 300 eV of [TPMT·AdoHcy] complex (precursor ion  $m/z$  3061). TPMT in multiple charge states ( $z=9$  and 10) and **(c)** singly charged AdoHcy ( $m/z$  385) were observed.
